# Supplementary material
Source: PubMed Central journal article supplement (PMC3143660)
Supplement: supp_M111.232249_jbc.M111.232249-1.pdf [file supp_M111.232249_jbc.M111.232249-1.pdf]

## SUPPLEMENTARY INFORMATION

### SUPPLEMENTARY METHODS

*Preparation of the cells for transmission electron microscopy* - Cells grown on coverslips were fixed for 45 minutes with 2.5% glutaraldehyde (50 mM cacodylate pH 7.2, 50 mM KCl, 2.5 mM MgCl<sub>2</sub>) at room temperature, then fixed for 2 hours at 4°C with 2% OsO<sub>4</sub> buffered with 50 mM cacodylate (pH 7.2), washed with H<sub>2</sub>O and incubated overnight at 4°C with 0.5% uranyl acetate (in H<sub>2</sub>O). The cells were dehydrated and embedded in Epon812. Sections stained with uranyl acetate and lead citrate were analyzed with a Zeiss EM10 or EM900 electron microscope (Zeiss, Oberkochen, Germany). Negatives were digitalized by scanning.

### SUPPLEMENTARY FIGURE LEGENDS

Fig. S1. Only  $\beta$ -barrel proteins from *Neisseria gonorrhoea* are colocalizing exclusively with mitochondria. Amino-terminally FLAG-tagged  $\beta$ -barrel proteins from enterobacteria *Escherichia coli* (OmpC, PhoE, BamA) and *Salmonella enterica* (YaeT) or from *Neisseria gonorrhoea* (PorB, Omp85) were overexpressed for 24-36 h in HeLa cells grown on cover slips. Cells were then stained with mitochondrial membrane potential-sensitive dye MitoTracker (red), fixed and analyzed by immunofluorescence with antibodies against FLAG-tag (green) and mitochondrial protein Tom20 (blue) and confocal microscopy.

Fig. S2. Presence of Omp85<sub>NgO</sub> in mitochondria does not affect their function or morphology. Cells from a cell line that, upon induction by doxycyclin (Dox) overexpresses Omp85 from *Neisseria gonorrhoea* with an amino-terminal Myc-tag (*myc-Omp85*<sub>NgO</sub>) were analyzed by immunofluorescence (upper part) or transmission electron microscopy (lower part, EM). For immunofluorescence, cells were decorated with antibodies directed against c-myc (green) or mitochondrial protein Tom20 (red).

Fig. S3. Deletion of the  $\beta$ -sorting signal from Omp85<sub>NgO</sub> affects its mitochondrial localization. FLAG-Omp85<sub>NgO</sub>-12, an amino-terminally FLAG-tagged construct of Omp85<sub>NgO</sub> lacking the last 12 amino acids was overexpressed in HeLa cells. Cells were stained with MitoTracker (red) and antibodies against the FLAG-tag (green) and mitochondrial protein Tom20 (blue).

Fig. S4. Sequence alignment of PorB proteins from different *Neisseria* sp. used in this study. Sequences were aligned using ClustalW2 program.

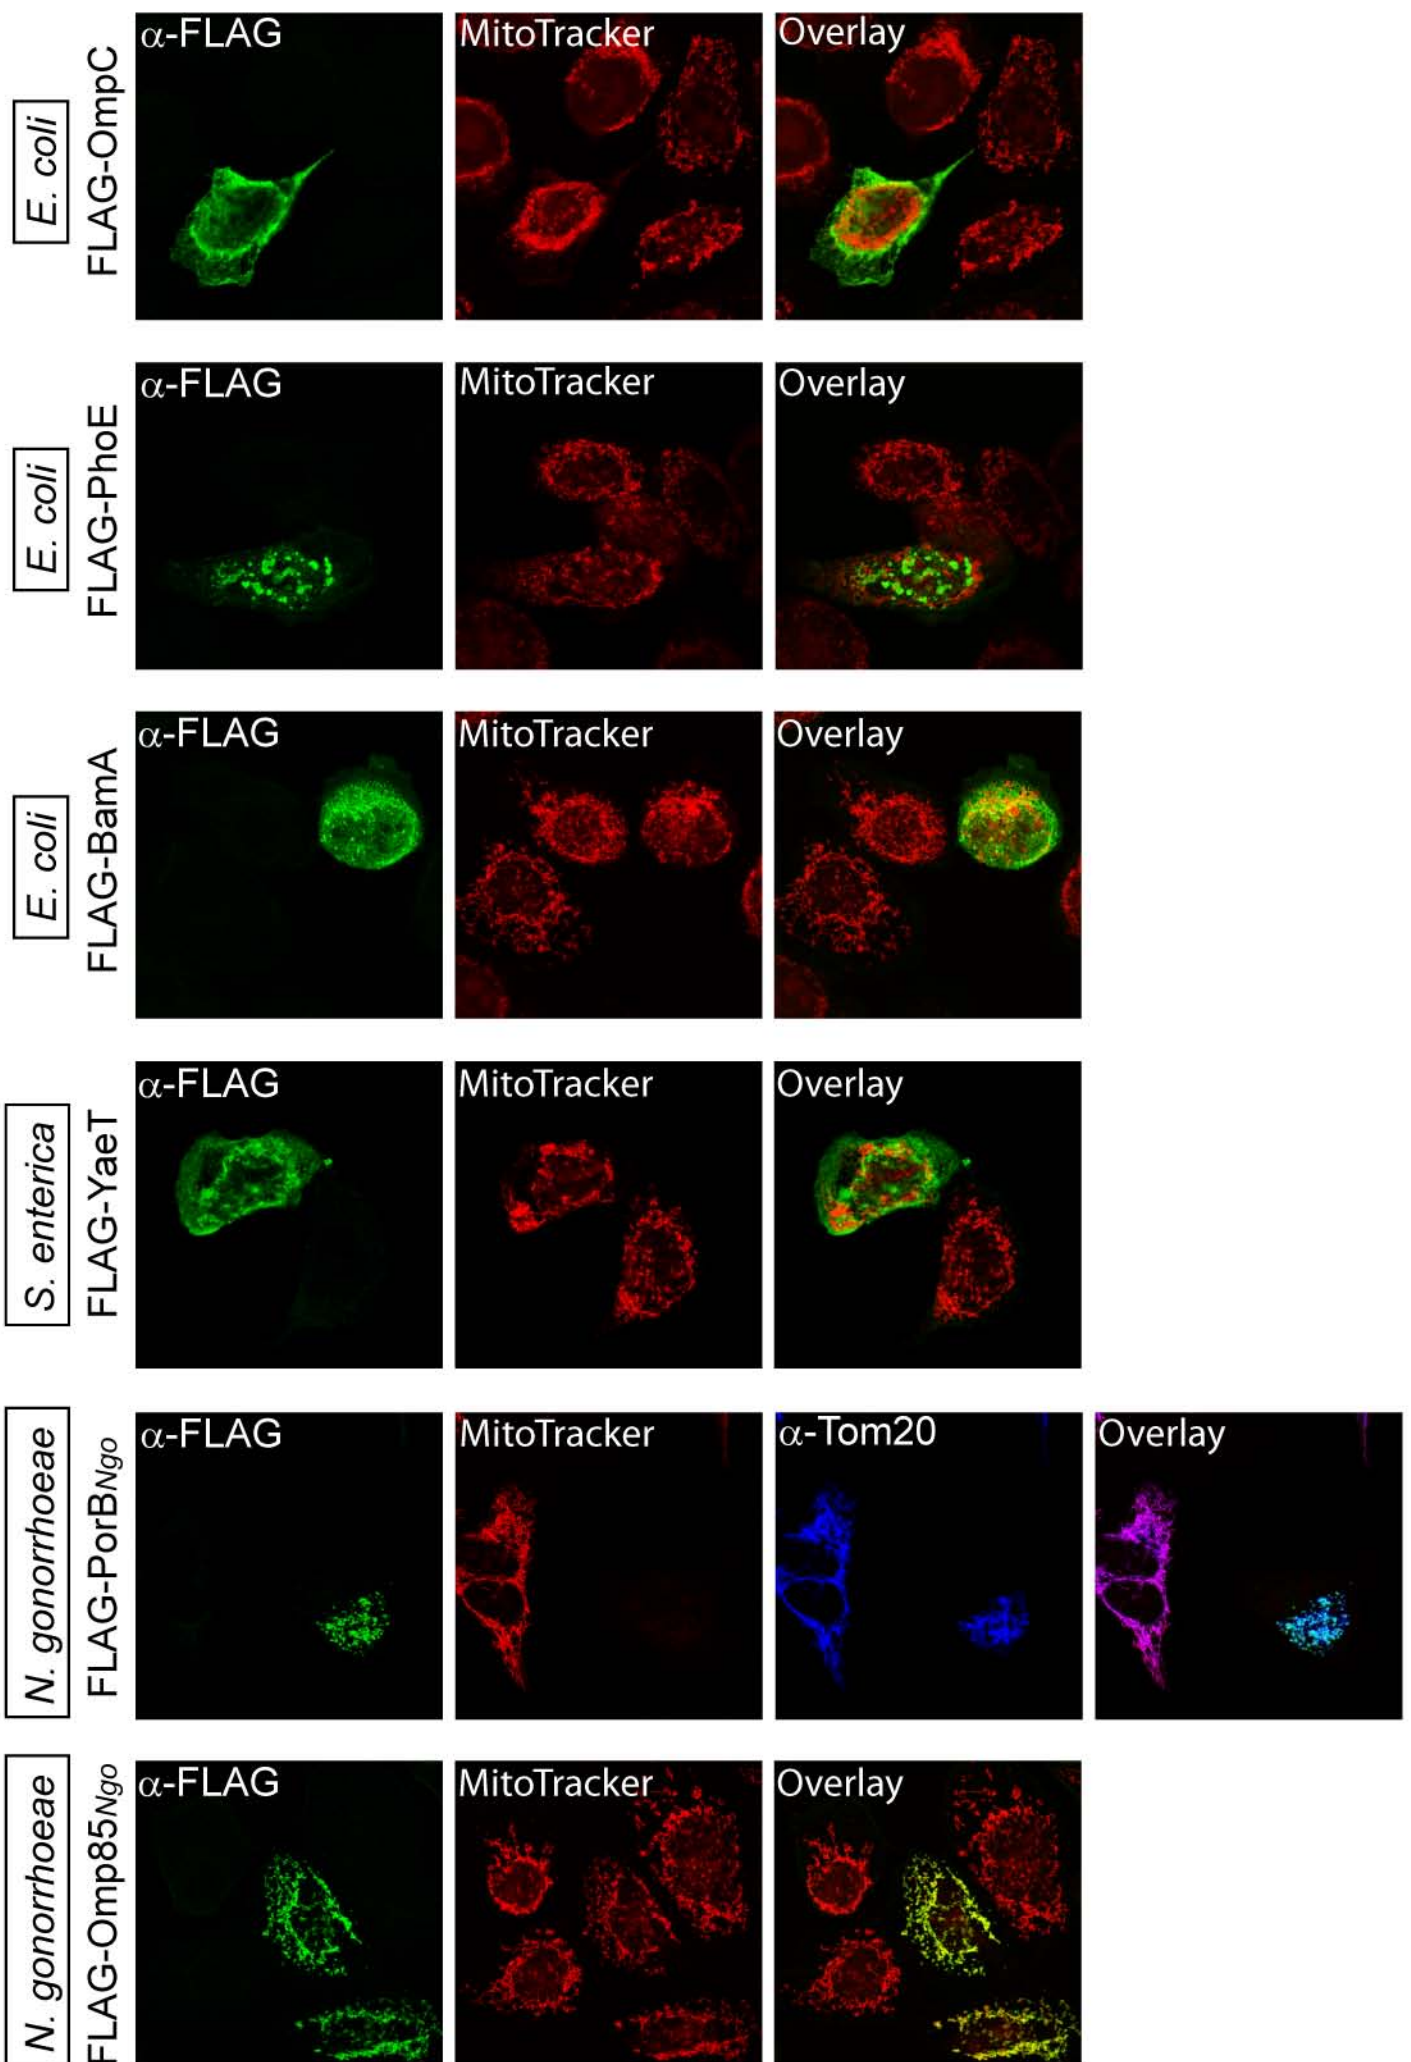

Supplementary Figure 1

*myc-Omp85<sub>Ngo</sub> -Dox*

$\alpha$ -c-myc

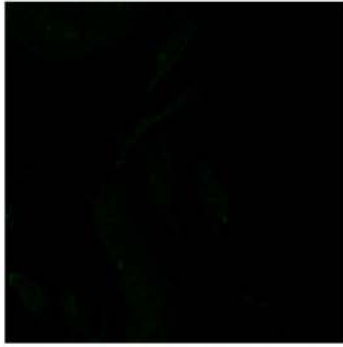

$\alpha$ -Tom20

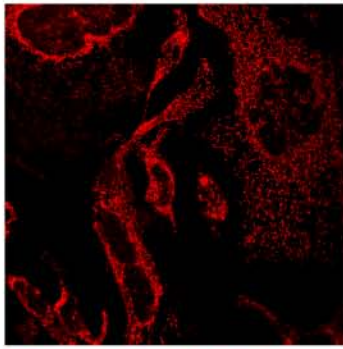

Overlay

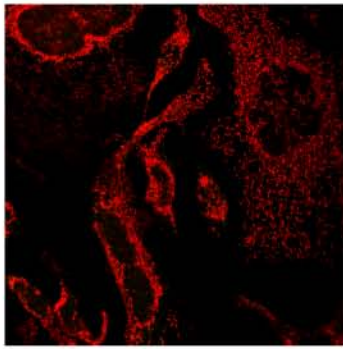

*myc-Omp85<sub>Ngo</sub> +Dox*

$\alpha$ -c-myc

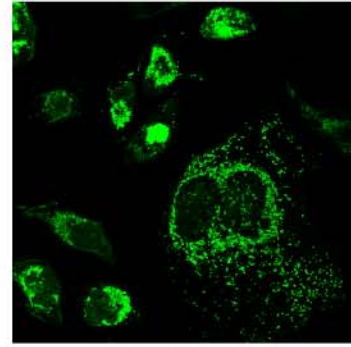

$\alpha$ -Tom20

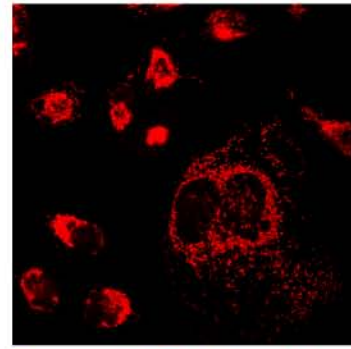

Overlay

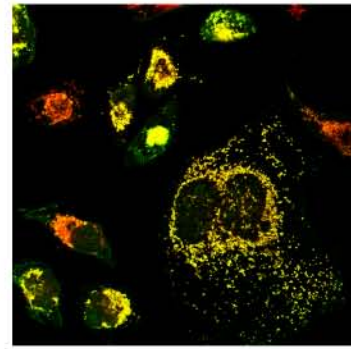

EM

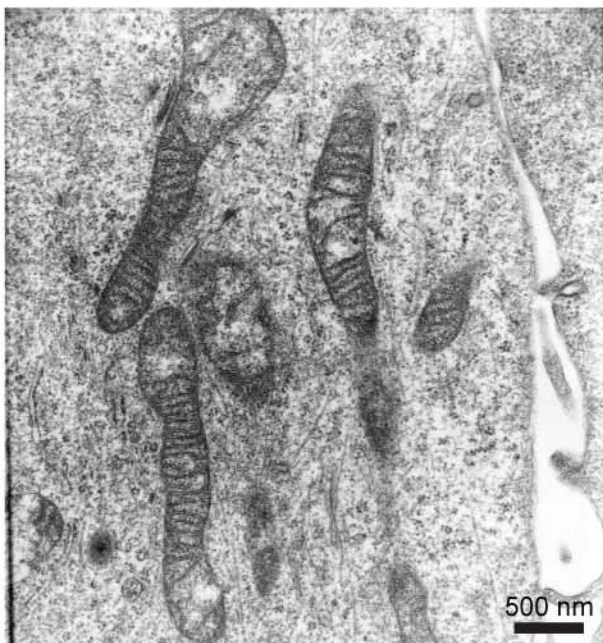

EM

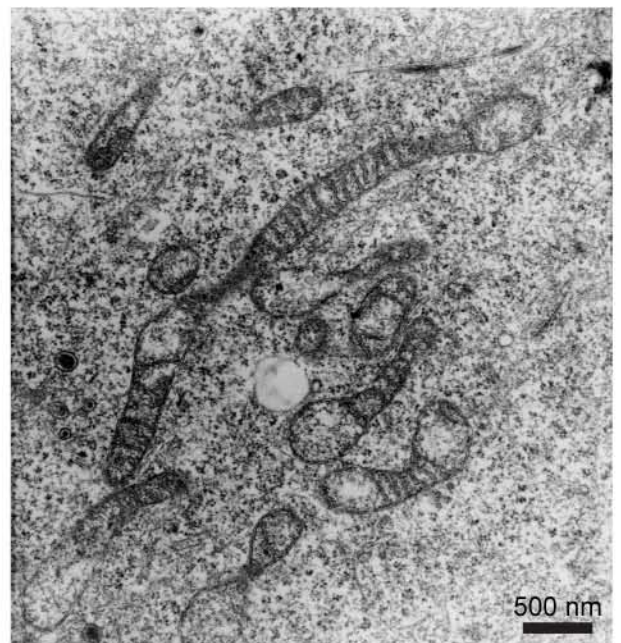

Supplementary Figure 2

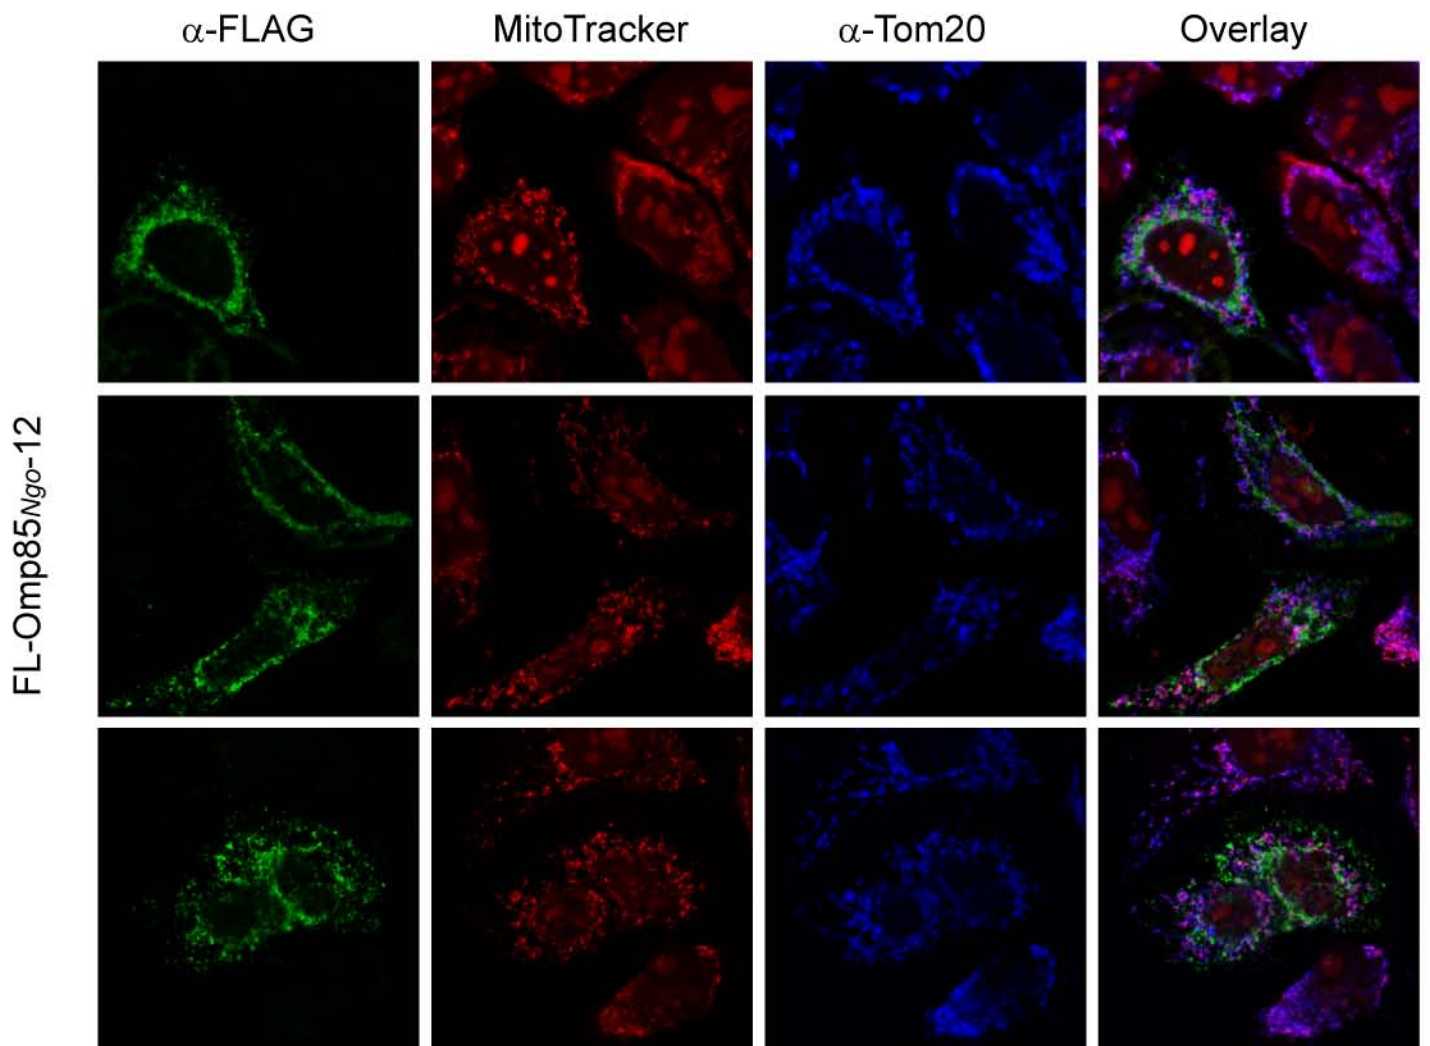

Supplementary Figure 3

PorB *N. gonorrhoeae* DVTLYGTIKAGVETSRVSAHHGA-----QADRVKTATEIADLGSKIGFKGQEDLGNGLKA 55  
 PorB *N. lactamica* DVTLYGTIKAGVETVRYTVKHTDG-----KVTEVKTGSEIADFGSKIGFKGQEDLGNGLKA 55  
 PorB *N. sicca* DVTLYGQIKAGVEVSKVNLGKKTATALGKEKSSKTATEIADLGSRVGFKGHEHLGSNLNA 60  
 PorB *N. cinerea* DVTLYGQVKAGVEISKVKVGKAT-----SKTATEIADYGSRIGFKGHEHLGSNLNA 51  
 \*\*\*\*\* :\*\*\*\*\* : \*\*.:\*\*\*\*\* \*\*.:\*\*\*\*\*:\*.\*\*\*.\*\*:\*

PorB *N. gonorrhoeae* IWQLEQKAYVSGTDTGWGNRQSFIFGLKGGFGKVRVGRLLNLIKDTGG-FNPWE-GKS--Y 111  
 PorB *N. lactamica* IWQLEQNASIAGTDSGWGNKQSFIFGLKGGFGTVRAGNLNSILKSTGDNVNAWESGKATED 115  
 PorB *N. sicca* IWQVEQKTSIAGGDKEWASRESFIGLEGGFGKVRAGKLNSTVKDSSDNVDQWES---NNG 117  
 PorB *N. cinerea* IWQVEQNTSIAGGDSGFANRESFIGLEGGFGKVRAGNLNTALKDSSDSFDPWESGAANAD 111  
 \*\*\*:\*\*\*: ::\* \* . :.::\*\*\*\*\*:\*\*\*\*\*.\*\*\*.\*\*\*. :\*:.. : \*

PorB *N. gonorrhoeae* YSGLSNIAQPEERHVSRYDSPEFAGFSGSVQYVPNDNSGKNR-----SESYHAGFN 163  
 PorB *N. lactamica* VLQVSKIGAPEHRYASVRYDSPEFAGFSGSVQYAPKDNNGAN-----GESYHVGLN 166  
 PorB *N. sicca* ALGLSVFTRVDKRAVSRYDSPVFAGFSASVQYTPRDNATPGDKYTHEVPSQDTYYAGLN 177  
 PorB *N. cinerea* ALQLGKIKRVDTRKVSRYDTPVFGGFSASVQYQPRDNANPGDKYTHTVKSRESYDLGLN 171  
 . : : \* .\*\*\*\*\*:\* \* .\*\*\*.\*\*\* \* .\*\* : . :\*: \*

PorB *N. gonorrhoeae* YKNSGFFVQYAGSYKR-----HNYTT-----EKHQVHRLVGGYDHDALYASV 205  
 PorB *N. lactamica* YQNSGFFAQYAGLQFQ-----HGEGTKATVGEPEVKLQVHRLVGGYDNDALYASV 216  
 PorB *N. sicca* YENSGFFGQYAGGFRK--NLKTG--KDasGKDTYEN---KDGQVHRLVAGYDANNLFVSV 230  
 PorB *N. cinerea* YENSGFFGRYAGSYAKRADLDAGYLDAFNGNTTLAAGAYKDHQAHRLTAGYDANNLMVAV 231  
 \*:\*\*\*\*\* :\*\*\* : : . :. \* .\*\*\*.\*\*\* : \* .\*:

PorB *N. gonorrhoeae* AVQQQD-----AKLTWRDDNSHN-----SQTEVA 229  
 PorB *N. lactamica* AVQQQD-----AKLAAAP-NSHN-----SQTEVA 239  
 PorB *N. sicca* AGQYAKNWETLGDYAQAQSNVVDAAHMAYPAGKTKQLNTVFGTDADLNNKGVETVEVA 290  
 PorB *N. cinerea* VGQYEG---FKADVAGAKKN-----ERTEVG 254  
 . \* . : \* . \*\*

PorB *N. gonorrhoeae* TTVAAYRFGNVTPRVSYAHGFKGSVYDAD-HDNTYDQVVVGAEYDFSKRTSALVSAGWLQK 288  
 PorB *N. lactamica* ATVAAYRFGNVTPRVSYAHGFKGTVAKAD-GDNRYDQVVVGAEYDFSKRTSALVSAGWLQE 298  
 PorB *N. sicca* ATAAAYRAGNVTPRVSYAHGFKAKVDGEKLGKGTQYDQVIVGADYDFSKRTTALVSTGWLRG 350  
 PorB *N. cinerea* ATAAAYRFGNVTPRVSYAHGFKAKEDGVKQNSAYNQVIVGADYDFSKRTSALLSAGWLKE 314  
 :\*.\*\*\* \*\*\*\*\*. . . . \*\*.:\*\*\*\*\*:\*\*\*\*\*:\*\*\*:\*\*\*:

PorB *N. gonorrhoeae* GK-GAEKFVATVGGVGLRHKF 308  
 PorB *N. lactamica* GK-GAGKTVSTASTVGLRHKF 318  
 PorB *N. sicca* AESGSHKVETISGLVGLRHKF 371  
 PorB *N. cinerea* GK-GDYKYEKTAGTVGLRHKF 334  
 .: \* \* . \*\*\*\*\*

## Supplementary Figure 4
